# Supplementary material for: Profile of upregulated inflammatory proteins in sera of Myasthenia Gravis patients
Source: PubMed Central journal article supplement (PMC5206650; doi:10.1038/srep39716), 2017-01-03
Supplement: srep39716-s1.pdf [file srep39716-s1.pdf]

# **Profile of upregulated inflammatory proteins in sera of Myasthenia Gravis patients**

**Carl Johan Molin<sup>+</sup>, Elisabet Westerberg<sup>+</sup>, Anna Rostedt Punga\***

Uppsala University, Department of Neuroscience, Clinical Neurophysiology, BMC,  
Husargatan 3, 75237 Uppsala, Sweden

<sup>+</sup> these authors contributed equally to this work

\* **Corresponding author:** [anna.rostedt.punga@neuro.uu.se](mailto:anna.rostedt.punga@neuro.uu.se)

**Supplementary table 1.**

| <b>Protein</b>                                    | <b><i>r</i></b> | <b><i>P</i>-value</b> |
|---------------------------------------------------|-----------------|-----------------------|
| Matrix metalloproteinase 10 (MMP-10)              | -0.13           | 0.38                  |
| Transforming growth factor alpha (TGF- $\alpha$ ) | -0.03           | 0.86                  |
| Protein S100-A12 (EN-RAGE)                        | -0.04           | 0.80                  |
| Beta-NGF                                          | -0.11           | 0.50                  |
| IL-6                                              | -0.24           | 0.12                  |
| IL-8                                              | -0.02           | 0.92                  |
| CCL19                                             | 0.11            | 0.48                  |
| IL-17C                                            | -0.11           | 0.48                  |
| CXCL1                                             | 0.10            | 0.52                  |
| IL-10                                             | -0.07           | 0.67                  |
| IL-17A                                            | -0.08           | 0.62                  |

Correlation analysis between MGC score and NPX value of each protein. *r* = Pearson correlation coefficient.
